# Supplementary material for: Synthetic Peucedanocoumarin IV Prevents α-Synuclein Neurotoxicity in an Animal Model of Parkinson’s Disease
Source: MDPI journal article supplement (doi:10.3390/ijms23158618), 2022-08-03
Supplement: s1 [file s1]

## **Supplementary figures**

### **Synthetic peucedanocoumarin IV prevents $\alpha$ -synuclein neurotoxicity in an animal model of Parkinson's disease**

Heejeong Kim, Han-Joo Maeng, Ji Hun Kim, Jin-Ha Yoon, Yohan Oh, Seung-Mann Paek, and  
Yunjong Lee

**A**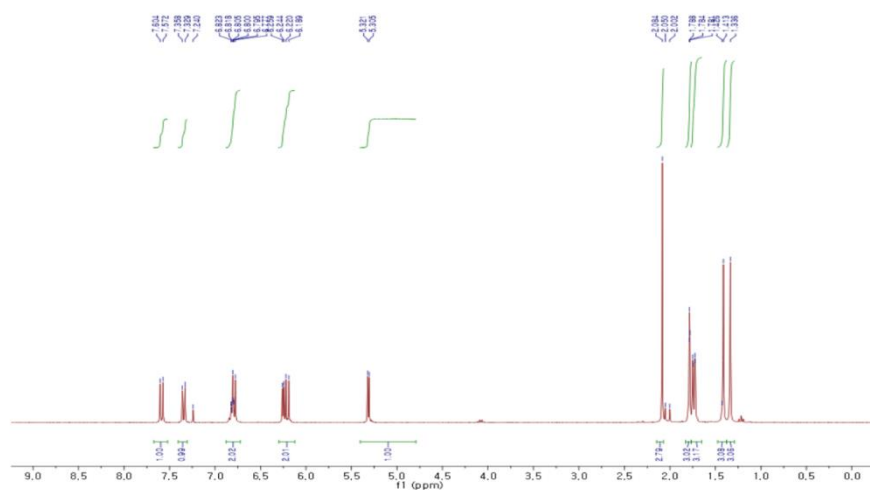**B**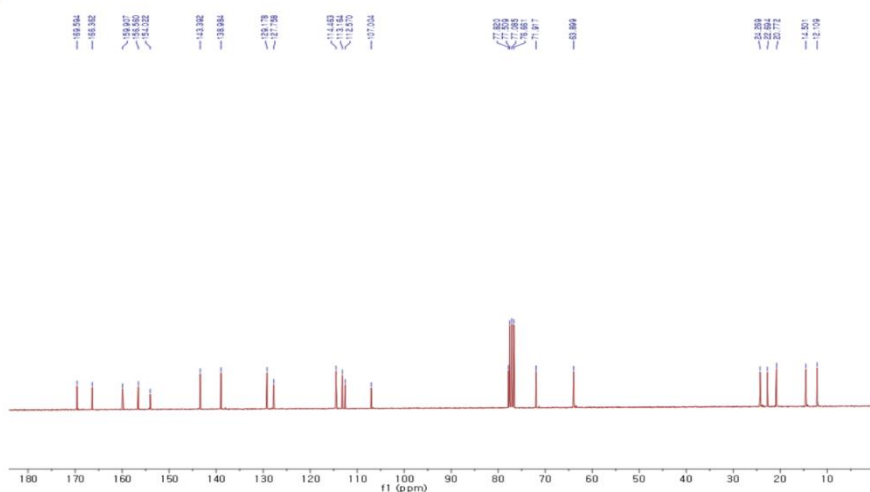

**Supplementary Figure S1. NMR analysis of synthetic PCiv**

(A) <sup>1</sup>H-NMR chart of synthesized PCiv.

(B) <sup>13</sup>C-NMR chart of synthesized PCiv.

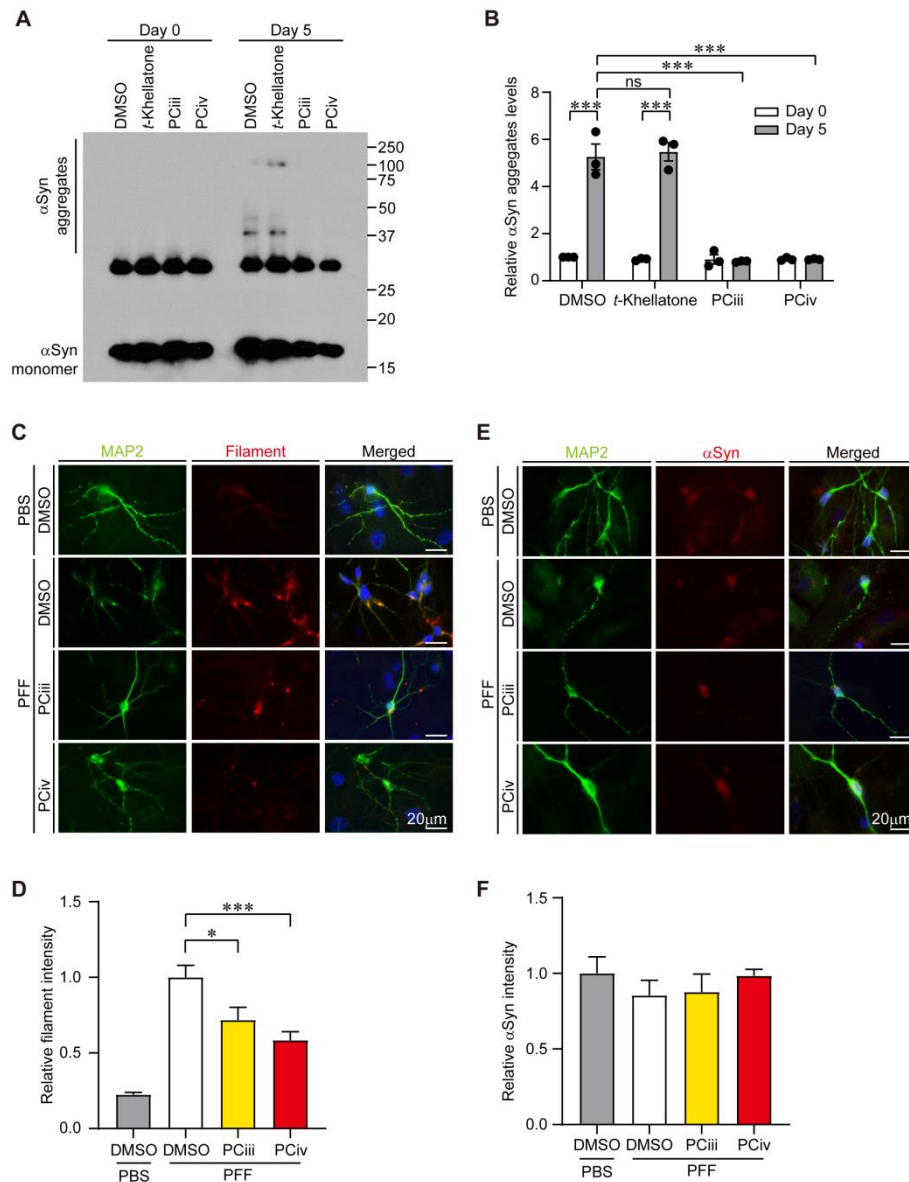

### Supplementary Figure S2. PCiv prevents $\alpha$ -synuclein aggregation in vitro and in cell $\alpha$ -synucleinopathy model

(A) Representative Western blots showing the degree of recombinant  $\alpha$ -synuclein ( $\alpha$ Syn) aggregation in a test tube in the presence or absence of *t*-Khellatone, PCiii, and PCiv (100  $\mu$ M) at 0 and 5 days of incubation (phosphate-buffered saline [PBS], 37  $^{\circ}$ C for 5 days). Aggregation of  $\alpha$ -synuclein was determined using  $\alpha$ -synuclein antibody. (B) Quantification of relative amount of  $\alpha$ -synuclein aggregate in high molecular weight sizes in panel A ( $n = 3$  per group). (C) Representative immunofluorescence of MAP2 and filament conformation- $\alpha$ Syn (Filament) in mice cortical neurons treated with  $\alpha$ -synuclein preformed fibril (PFF) (1  $\mu$ g, for 14 days) in the presence or absence of PCiii and PCiv (1  $\mu$ M every 2 days for 14 days). (D) Quantification of filament conformation- $\alpha$ Syn (Filament) immunofluorescence signal intensities in MAP2-positive cortical neurons in each experimental group ( $n = 15$  cells from three separate experiments). (E) Representative immunofluorescence of

MAP2 and  $\alpha$ Syn in mice cortical neurons of the treatments applied in the panel (C). (F) Quantification of  $\alpha$ Syn immunofluorescence signal intensities in MAP2-positive cortical neurons in each experimental group ( $n = 15$  cells from three separate experiments). The data are expressed as means  $\pm$  SEMs.  $*P < 0.05$ ,  $***P < 0.001$ , ANOVA test followed by Tukey's post hoc analysis. ns, non-significant.

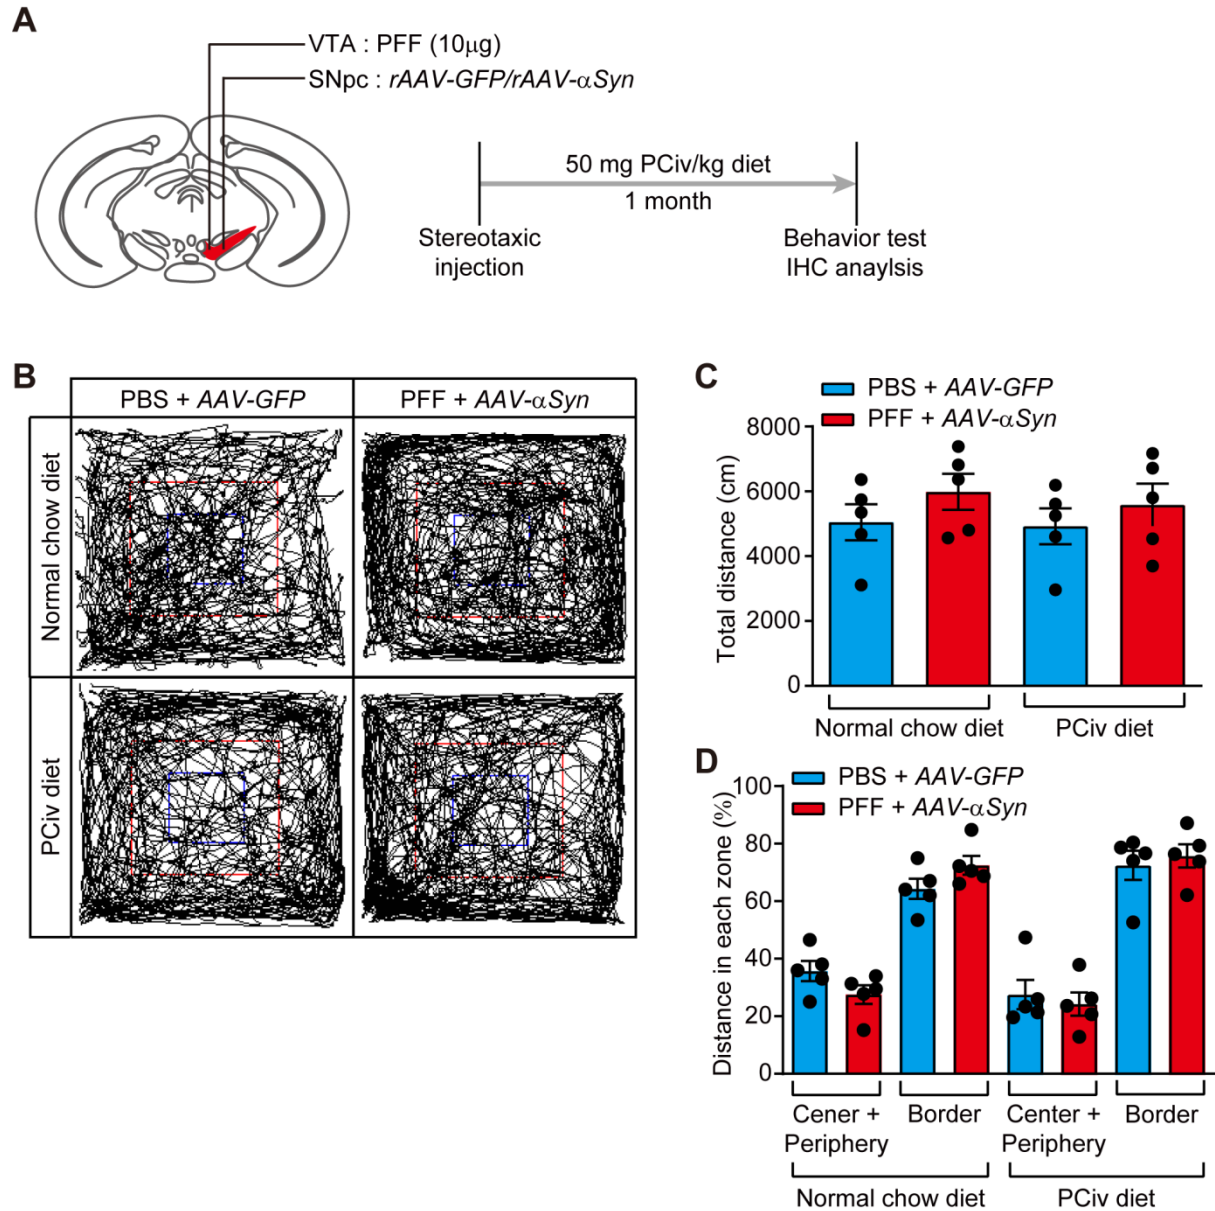

### Supplementary Figure S3. Open field exploration of mice with PCiv administration

(A) Schematic summary of experimental procedure. PFF and rAAV-αSyn were injected into ventral tegmental area (VTA), and substantia nigra pars compacta (SNpc) subregions of one hemisphere of mice, respectively. PBS + rAAV-GFP coinjection group was used as control. PCiv diet (50 mg per kg diet for 30 d) was administered following PFF and rAAV-αSyn nigral injections and continued for 30 days until subsequent behavioral and pathological analysis.

(B) Representative exploratory paths of mice nigraly injected with PFF and AAV-αSyn and treated with PCiv (50 mg/kg diet) or a regular diet in an open-field test. The “Center + Periphery” zone is the area inside the red box, and the “Border” zone is the area outside of the red box.

(C) The total distance traveled by mice in each experimental group during the 15-min open field test session ( $n = 5$  per group).

(C) Percentage of distance spent in the Center + Periphery or Border zones of the open field arena as an indicator of anxiety ( $n = 5$  mice per group). The data are expressed as means  $\pm$  SEMs.

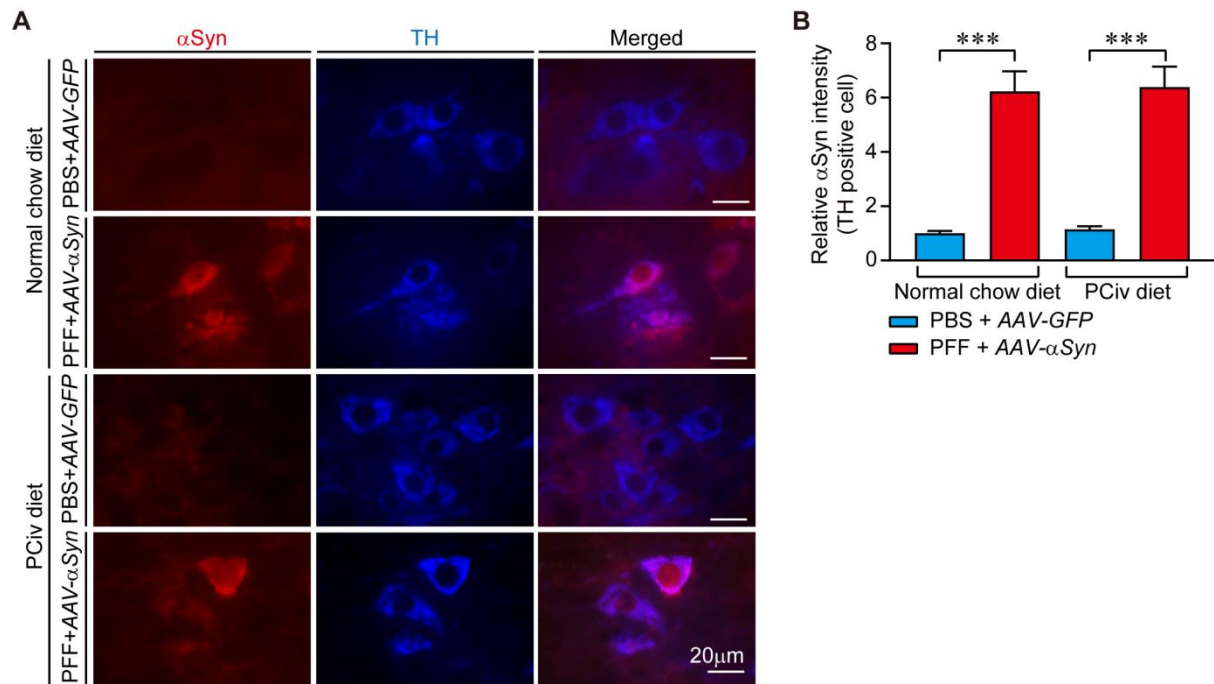

**Supplementary Figure S4. Total  $\alpha$ -synuclein expression is not altered with PCiv treatment *in vivo***

(A) Representative immunofluorescence images of  $\alpha$ Syn and TH in the substantia nigra coronal sections of the indicated experimental mice groups. (B) Quantification of relative  $\alpha$ Syn fluorescence intensities in the TH-positive dopamine neurons of the substantia nigra sections from the indicated experimental groups ( $n = 32$  cells from 5 mice per group). The quantified data are expressed as means  $\pm$  SEMs. Statistical significance was determined by an ANOVA test with Tukey's post hoc analysis, \*\*\* $p < 0.001$ . ns = non-significant.

**Supplementary Table S1. Pharmacokinetic parameters of PCiv**

Pharmacokinetic properties of PCiv obtained from the analysis of Figure 3. C<sub>max</sub>, maximum serum concentration; T<sub>max</sub>, time to peak drug concentration; AUC<sub>last</sub> and AUC<sub>infinity</sub>, area under curve from time 0 to the last measurable concentration or infinity time point; CL<sub>t</sub>, total drug clearance from body; V<sub>ss</sub>, steady state volume of distribution; MRT, mean residence time; BA, bioavailability.

|                                        | i.v.<br>(n=5)   | p.o.<br>(n=4)     |
|----------------------------------------|-----------------|-------------------|
| C <sub>max</sub> (μg/mL)               | –               | 0.03453 ± 0.02143 |
| T <sub>max</sub> (min)                 | –               | 213.8 ± 144.1     |
| t <sub>1/2</sub> (min)                 | 85.50 ± 51.36   | 97.22 ± 10.25     |
| AUC <sub>last</sub><br>(μg/mL×min)     | 76.89 ± 23.29   | 7.44 ± 5.19       |
| AUC <sub>infinity</sub><br>(μg/mL×min) | 78.72 ± 24.55   | 7.83 ± 5.28       |
| CL <sub>t</sub> (mL/min/kg)            | 136.5 ± 38.5    | –                 |
| V <sub>ss</sub> (mL/kg)                | 6620.9 ± 1899.7 | –                 |
| MRT (min)                              | 53.34 ± 26.63   | –                 |
| BA (%)                                 | –               | 9.96              |



**Supplementary Table S2. PCiv tissue distribution**

Detailed information on the concentration of PCiv in each tissue 15 min after intravenous administration of PCiv in rats. The tissue-to-plasma concentration ratio is shown in the last column.

| Organs | Concentration<br>(ng/mL, ng/g organ) | Tissue-to-plasma<br>concentration ratio |
|--------|--------------------------------------|-----------------------------------------|
| Plasma | 1116 ± 295 ng/ml                     | –                                       |
| Liver  | 337 ± 76 ng/g tissue                 | 0.32 ± 0.13                             |
| Heart  | 4580 ± 274 ng/g tissue               | 4.32 ± 1.21                             |
| Kidney | 594 ± 196 ng/g tissue                | 0.54 ± 0.17                             |
| Brain  | 6790 ± 2846 ng/g tissue              | 6.40 ± 3.42                             |
